# Supplementary material for: Trifluoroacetylation and ionic hydrogenation of [2-(3-alkoxythienyl)]di(1-adamantyl)methanols †
Source: Royal Society of Chemistry journal article supplement (doi:10.1039/b002186p), 2000-01-01
Supplement: b002186p.doc [file b002186p.doc]

Supplementary data

Trifluoroacetylation and Ionic Hydrogenation of [2-(3-Alkoxythienyl)]di(1-adamantyl)methanols

John S. Lomas,*a Edouard Vauthiera and Jacqueline Vaissermannb

a Institut de Topologie et de Dynamique des Systèmes, Université de Paris 7, associé au C. N. R. S., 1 rue Guy de la Brosse, 75005 Paris, France
b Laboratoire de Chimie des Métaux de Transition, Université de Paris 6, associé au C. N. R. S., Case 42, 4 place Jussieu, 75252 Paris Cedex 05, France


Table 5 Kinetic simulation of product composition for the reaction of 2-(3-ethoxythienyl)di(1-adamantyl)-methanol, 2A, with TFA and dimethylphenylsilane in dichloromethane; [2A]o = 0.018-0.019; arbitrary constants: k0 = k1 = 1 x 10-3 s-1; k5 = 1 x 10-4 s1. 
[Me2PhSiL]o 	103 k3/s-1	103 k2/s-1	103 k4/s-1	
L = D				
0.0750        	2.587	5.241	1.423	
0.1115        	2.611	5.890	1.498	
0.1526        	2.611	5.661	1.504	
0.1875        	2.655	6.248	1.348	
0.2207        	2.646	5.795	1.518	
0.2600        	2.800	6.089	1.605	
0.2958        	2.526	5.758	1.384	
Means         	2.630.08	5.810.32	1.470.09	
L = H				
0.0760	4.391	10.88	2.408	
0.1124	4.533	10.00	2.287	
0.1502	4.187	9.28	1.984	
0.1906	4.952	10.93	1.886	
0.2228	4.594	10.14	2.250	
0.2613	4.714	10.42	2.476	
Means	4.650.28	10.30.6	2.220.23	

Table 6 Kinetic simulation of product composition for the reaction of 2-(3-ethoxythienyl)di(1-adamantyl)-methanol, 2A, with TFA and triethylsilane in dichloromethane; [2A]o = 0.018-0.019; arbitrary constants: k0 = k1 = 1 x 10-3 s-1; k5 = 1 x 10-4 s1.
[Et3SiL]o	104 k3/s-1	103 k2/s-1	103 k4/s-1	
L = D				
0.0750	3.367	1.256	1.652	
0.1459	3.073	1.379	1.665	
0.2173	5.508	1.364	1.426	
0.2849	4.626	1.282	1.530	
Means	4.141.13	1.320.06	1.570.11	
L = H				
0.0726	5.707	1.878	1.995	
0.1500	5.808	1.864	2.071	
0.2243	6.291	2.007	2.124	
0.2893	6.141	1.952	2.071	
Means	5.990.28	1.930.07	2.070.05	
